# Supplementary material
Source: MDPI journal article supplement (https://www.mdpi.com/2673-4095/2/1/8)
Supplement: s1 [file s1]

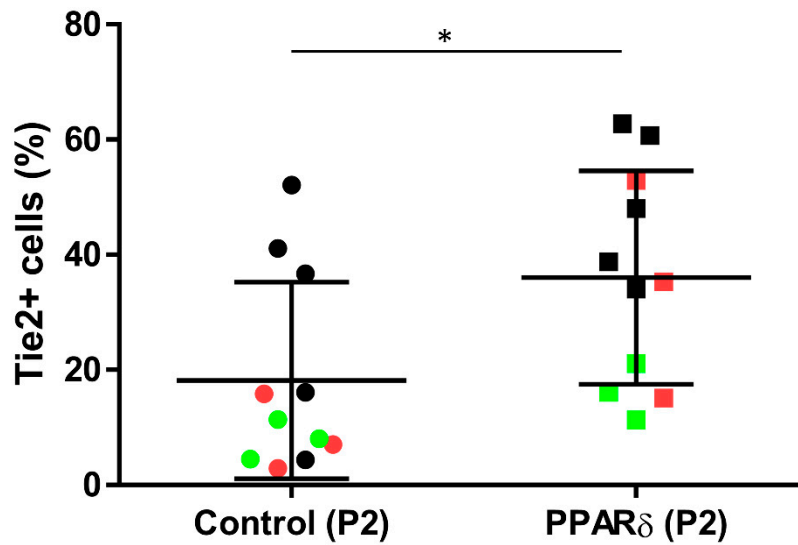

**Supplementary Figure S1.** Plot of individual values of Tie2+ cells percentage in the human NPC population. The black point showed in Figure 3a, this cells thawing in passage 1, and treated with PPAR $\delta$  agonist and vehicle control in passage 2. The red point showed cells thawing in passage 1 and then treated with PPAR $\delta$  agonist and vehicle control. The green point showed cells thawing in passage 1 and then treated with PPAR $\delta$  agonist and untreated control.  $n=11$ , M-W U test  $p=0.00245$ , \* =  $p$ -value < 0.05. Lines represent means  $\pm$  standard deviation (SD).

**Supplementary Table S1.** Donor list of the data presented in supplementary Figure S1 with gender, age, Pfirmann grading, and location of the tissue probe.

| No. | Gender | Age | Pfirmann Grade* | Location |
|-----|--------|-----|-----------------|----------|
| 1   | female | 30  | 1               | T3/L4    |
| 2   | female | 45  | 2               | L6/L7    |
| 3   | male   | 28  | 2               | L1/L2    |
